# Supplementary material for: Predictors of explicit and implicit anthropomorphism in house facades
Source: PubMed Central journal article supplement (PMC11569235; doi:10.1038/s41598-024-77839-z), 2024-11-16
Supplement: 41598_2024_77839_MOESM1_ESM.pdf [file 41598_2024_77839_MOESM1_ESM.pdf]

1 **Appendix A**

2 As the following table shows, all distance measures correlate highly with each other. The restriction  
 3 to the measure we have chosen is therefore not only theoretically but also empirically  
 4 unproblematic.

5 **Table A1** CORRELATIONS BETWEEN THE DIFFERENT SEMANTIC DISTANCE MEASURES

| Distance measure | Mean        | Median      | Mean        | Median      | Mean        | Median      | Mean        | Media        |
|------------------|-------------|-------------|-------------|-------------|-------------|-------------|-------------|--------------|
|                  | <i>_CS_</i> | <i>_CS_</i> | <i>_CS_</i> | <i>_CS_</i> | <i>_EC_</i> | <i>_EC_</i> | <i>_EC_</i> | <i>n_EC_</i> |
|                  | <i>MD</i>   | <i>MD</i>   | <i>Mean</i> | <i>Mean</i> | <i>MD</i>   | <i>Mean</i> | <i>Mean</i> | <i>Mean</i>  |
| Mean_CS_MD       | 1           | .937**      | .996**      | .944**      | .910**      | .867**      | .906**      | .862**       |
| Median_CS_MD     | .937**      | 1           | .929**      | .953**      | .847**      | .868**      | .842**      | .861**       |
| Mean_CS_Mean     | .996**      | .929**      | 1           | .946**      | .910**      | .866**      | .907**      | .861**       |
| Median_CS_Mean   | .944**      | .953**      | .946**      | 1           | .854**      | .862**      | .849**      | .856**       |
| Mean_EC_MD       | .910**      | .847**      | .910**      | .854**      | 1           | .919**      | .996**      | .915**       |
| Median_EC_MD     | .867**      | .868**      | .866**      | .862**      | .919**      | 1           | .913**      | .983**       |
| Mean_EC_Mean     | .906**      | .842**      | .907**      | .849**      | .996**      | .913**      | 1           | .917**       |
| Median_EC_Mean   | .862**      | .861**      | .861**      | .856**      | .915**      | .983**      | .917**      | 1            |

6 **Note:** cosine distance (CS), euclidean distance (EC) \*\* The correlation is significant at the 0.01  
 7 level (2-sided)

8

9 **Appendix B**

10 **Table B1** UNSTANDARDIZED LOADINGS OF THE HIERARCHICAL LINEAR MODEL (HLM) IN  
 11 RELATION TO IHAS

| <b>Variable</b> |                 |                   |                |                          |                          |
|-----------------|-----------------|-------------------|----------------|--------------------------|--------------------------|
| <b>name</b>     | <i>Estimate</i> | <i>Std. Error</i> | <i>P-Value</i> | <i>Q<sub>0,025</sub></i> | <i>Q<sub>0,075</sub></i> |
| intercept       | 7.12E-01        | 1.41E-02          | 2.00E-16       | 6.84E-01                 | 7.39E-01                 |
| facelikeness    | -2.92E-05       | 3.90E-05          | 0.4541         | -1.06E-04                | 4.74E-05                 |
| childlikeness   | 4.45E-05        | 4.42E-05          | 0.3146         | -4.22E-05                | 1.31E-04                 |
| friendliness    | -5.58E-05       | 5.48E-05          | 0.3088         | -1.63E-04                | 5.16E-05                 |
| threat          | -6.76E-06       | 5.28E-05          | 0.8981         | -1.10E-04                | 9.68E-05                 |
| age             | 5.09E-04        | 2.54E-04          | 0.0461*        | 9.43E-06                 | 1.01E-03                 |
| sex             | -1.03E-03       | 4.86E-03          | 0.8328         | -1.06E-02                | 8.52E-03                 |
| nationality     | -4.03E-03       | 3.09E-03          | 0.1933         | -1.01E-02                | 2.05E-03                 |

12 **Note:** \* The correlation is significant at the 0.05 level (2-sided)

13
